# Supplementary material for: IR spectrum of SiH3OH2+SiH4: cationic OH⋯HSi dihydrogen bond versus charge-inverted SiH⋯Si hydrogen bond
Source: Royal Society of Chemistry journal article supplement (doi:10.1039/d4cp02428a), 2024-01-01
Supplement: d4cp02428a1.pdf [file d4cp02428a1.pdf]

## Electronic Supporting Information (ESI)

### Table of Contents

#### Description of $\text{SiH}_3\text{OH}_2^+\text{SiH}_4\text{-Ar}$ isomers

**Tables S1-S3.** Computed vibrational frequencies (in  $\text{cm}^{-1}$ , B3LYP-D3/aug-cc-pVTZ) of: **(S1)**  $\text{SiH}_3\text{OH}_2^+$  and  $\text{SiH}_3\text{OH}_2^+\text{-Ar(I/II)}$ , **(S2)**  $\text{SiH}_3\text{OH}_2^+\text{SiH}_4\text{(I-IV)}$ , and **(S3)**  $\text{SiH}_3\text{OH}_2^+\text{SiH}_4\text{(I-IV)-Ar(I-IV)}$  compared to experimental values.

**Tables S4-S9.** Various energies ( $\text{kJ mol}^{-1}$ ) calculated at the B3LYP-D3/cc-pVTZ level: **(S4)**  $\text{SiH}_3\text{OH}_2^+\text{SiH}_4\text{(I-IV)}$ ; **(S5)** I-Ar(I-IV); **(S6)** II-Ar(I-IV); **(S7)** III-Ar(I-IV); **(S8)** IV-Ar(I-IV); **(S9)** (I-IV)-Ar(I-IV).

**Figure S1.** Typical mass spectrum of the ion source in the mass range  $m/z$  10-130 for the pulsed supersonic plasma expansion of a  $\text{SiH}_4/\text{He}/\text{Ar}$  gas mixture (ratio 1:20:200) at 5 bar stagnation pressure seeded with  $\text{H}_2\text{O}$ .

**Figure S2.** Collision-induced dissociation (CID) spectrum of size-selected  $\text{SiH}_3\text{OH}_2^+\text{SiH}_4\text{-Ar}$  clusters to illustrate the loss of Ar and  $\text{SiH}_4$  as major fragmentation channel and to verify the composition of the investigated mass-selected parent ions.

**Figure S3.** NBO charge distribution (in me) of  $\text{SiH}_4$ ,  $\text{SiH}_3\text{OH}_2^+$ , and  $\text{SiH}_3\text{OH}_2^+\text{SiH}_4\text{(I-IV)}$  in their ground electronic state (B3LYP-D3/aug-cc-pVTZ).

**Figures S4-S7.** IRPD spectrum of  $\text{SiH}_3\text{OH}_2^+\text{SiH}_4\text{-Ar}$  compared to linear IR absorption spectra of **(I-IV)-Ar(I-IV)** together with their equilibrium structures calculated at the B3LYP-D3/aug-cc-pVTZ level. Differences in relative energy ( $E_0$ ) are given in  $\text{kJ mol}^{-1}$ . **(S4)** I-Ar(I-IV); **(S5)** II-Ar(I-IV); **(S6)** III-Ar(I-IV); **(S7)** IV-Ar(I-IV).

**Figure S8.** Visualization of molecular orbitals (MO) of  $\text{SiH}_3\text{OH}_2^+\text{SiH}_4\text{(I)}$ .

**Cartesian coordinates (in Å) and energies (in hartree) of all relevant structures**

## Description of $\text{SiH}_3\text{OH}_2^+\text{SiH}_4\text{-Ar}$ isomers

$\text{SiH}_3\text{OH}_2^+\text{SiH}_4\text{-Ar(I-IV)}$  isomers are calculated for each  $\text{SiH}_3\text{OH}_2^+\text{SiH}_4\text{(I-IV)}$  isomer, which are shown in Figures S4-S7 along with their spectra compared to the experimental  $\text{SiH}_3\text{OH}_2^+\text{SiH}_4\text{-Ar}$  spectrum and the spectrum of their untagged  $\text{SiH}_3\text{OH}_2^+\text{SiH}_4$  isomer. The vibrational assignment is listed in Table S3 and all relevant energies are listed in Tables S5-S9. In the respective most stable (I-IV)-Ar(I) structures, Ar is bound to the free OH group at distances of 2.228, 2.223, 2.226, and 2.287 Å, with binding energies of  $D_0=13.99$ , 13.79, 13.45 and 11.28  $\text{kJ mol}^{-1}$ . This leads to slight elongations of the involved O-H bonds by 7, 8, 8, and 6 mÅ and contractions of the adjacent O-H bonds by 5, 5, 4, and 1 mÅ for I-Ar(I), II-Ar(I), III-Ar(I) and IV-Ar(I), respectively. As a result, the  $\nu_{\text{OH}}^f/\nu_{\text{OH}}^s$  modes of (I-IV)-Ar(I) are redshifted to 3448, 3442, 3442, and 3482  $\text{cm}^{-1}$  and the  $\nu_{\text{OH}}^b/\nu_{\text{OH}}^a$  modes of (I-IV)-Ar(I) are blueshifted by 76, 74, 73, and 46  $\text{cm}^{-1}$  to 2934, 2925, 2958, and 3633  $\text{cm}^{-1}$ , respectively. In the case of (I-III)-Ar(I), Ar attachment leads to a weakening of the dihydrogen bridges, whose binding distances are increased by 16, 25, and 26 mÅ, respectively. In the (I/II)-Ar(II) isomers ( $E_0=5.64$  and 5.85  $\text{kJ mol}^{-1}$ ), Ar is bound almost perpendicularly ( $\phi_{\text{OHAr}}=96.5^\circ$ ,  $101.1^\circ$ ) to the H atom of the  $\text{H}_2\text{O}$  moiety in the dihydrogen bridge with bond distances of 3.206 and 3.247 Å and binding energies of  $D_0=8.34$  and 8.26  $\text{kJ mol}^{-1}$ , respectively. As a result, the O-H bonds are slightly shortened by 1 and 2 mÅ, leading to small blueshifts of the corresponding  $\nu_{\text{OH}}^b$  modes by 12 and 18  $\text{cm}^{-1}$  to 2870 and 2869  $\text{cm}^{-1}$ . A corresponding computational approach for a III-Ar(II) isomer, where Ar is also bonded almost perpendicularly to the H atom of the  $\text{H}_2\text{O}$  group in the DHB, leads to a rotation of the  $\text{SiH}_3/\text{SiH}_4$  groups and converges to the II-Ar(II) isomer. In IV-Ar(II) ( $E_0=5.61$   $\text{kJ mol}^{-1}$ ), Ar is bound to the other free OH group with a binding energy of  $D_0=11.02$   $\text{kJ mol}^{-1}$ , resulting in a similar elongation of the involved O-H bond by 1 mÅ and corresponding redshift of the  $\nu_{\text{OH}}^s$  modes to 3482  $\text{cm}^{-1}$  and blueshift of the  $\nu_{\text{OH}}^a$  mode to 3634  $\text{cm}^{-1}$  as for IV-Ar(I). In (I-III)-Ar(III) ( $E_0=6.33$ , 6.03, 5.56  $\text{kJ mol}^{-1}$ ), Ar is bound to the  $\text{SiH}_3$  moiety with the same binding distance to Si of  $R_{\text{SiAr}}=3.311$  Å and binding energies of  $D_0=7.65$ , 7.76, and 7.89  $\text{kJ mol}^{-1}$ . As a result, the involved O-H bonds of the dihydrogen bridges are slightly shortened by 3 mÅ leading to blueshifts of the  $\nu_{\text{OH}}^b$  modes by 43, 45, and 45  $\text{cm}^{-1}$  to 2901, 2896, and 2930  $\text{cm}^{-1}$ , respectively. In (IV)-Ar(III) ( $E_0=7.30$   $\text{kJ mol}^{-1}$ ), Ar is bound almost perpendicularly ( $\phi_{\text{SiHAr}}=91.5^\circ$ ) to the bridging H atom of the Si-H-Si bridge with a bond distance to H of  $R_{\text{HAr}}=3.396$  Å and binding energies of  $D_0=5.89$   $\text{kJ mol}^{-1}$ . This affects the Si-H-Si bridge by shortening the Si-H and Si-H...Si bonds by 2 and 3 mÅ, respectively, but has almost no effect on the O-H bonds and their vibrational modes. In (I-III)-Ar(IV) ( $E_0=10.09$ , 9.88, 9.86  $\text{kJ mol}^{-1}$ ), Ar is bound to  $\text{SiH}_4$  with binding distances to Si of  $R_{\text{SiAr}}=3.617$ , 3.617, and 3.627 Å and binding energies of  $D_0=3.90$ , 3.91, and 3.59  $\text{kJ mol}^{-1}$ , respectively. This leads to a slight elongation of the O-H bonds involved in the dihydrogen bridge by 1, 2, and 2 mÅ, resulting in small redshifts of the corresponding  $\nu_{\text{OH}}^b$  modes of 31, 29, and 28  $\text{cm}^{-1}$  to 2827, 2822, and 2857  $\text{cm}^{-1}$ , respectively. In (IV)-Ar(IV) ( $E_0=7.30$   $\text{kJ mol}^{-1}$ ), Ar is also bound to  $\text{SiH}_4$  with a bond distance to Si of  $R_{\text{SiAr}}=3.563$  Å and a binding energy of  $D_0=3.99$   $\text{kJ mol}^{-1}$ . However, because  $\text{SiH}_4$  is bound to the  $\text{SiH}_3$  group here, Ar tagging has almost no effect on the O-H bonds and their vibrational modes.

**Table S1.** Computed vibrational frequencies (in  $\text{cm}^{-1}$ , B3LYP-D3/aug-cc-pVTZ) of  $\text{SiH}_3\text{OH}_2^+$  and  $\text{SiH}_3\text{OH}_2^+-\text{Ar}$  compared to experimental values. The experimental values are given with peak width (fwhm in parenthesis) and are assigned to the most dominant vibrations.<sup>a</sup>

| Mode                                    | $\text{SiH}_3\text{OH}_2^+$ | $\text{SiH}_3\text{OH}_2^+-\text{Ar}(\text{H})$ | $\text{SiH}_3\text{OH}_2^+-\text{Ar}(\text{Si})$ | Exp                 |
|-----------------------------------------|-----------------------------|-------------------------------------------------|--------------------------------------------------|---------------------|
| $\nu_{\text{OH}}^{\text{b}(\text{Ar})}$ |                             | 3369 (984)                                      |                                                  | <b>C1</b> 3400 (21) |
| $\nu_{\text{OH}}^{\text{s}}$            | 3550 (232)                  |                                                 | 3556 (237)                                       |                     |
| $\nu_{\text{OH}}^{\text{f}}$            |                             | 3602 (314)                                      |                                                  | <b>E</b> 3600 (30)  |
| $\nu_{\text{OH}}^{\text{a}}$            | 3626 (319)                  |                                                 | 3632 (304)                                       |                     |

<sup>a</sup>Data taken from George et al., *Angew. Chem. Int. Ed.* 2018, **57**, 2919.

**Table S2.** Computed vibrational frequencies (in  $\text{cm}^{-1}$ , B3LYP-D3/aug-cc-pVTZ) of  $\text{SiH}_3\text{OH}_2^+\text{SiH}_4(\text{I-IV})$  compared to experimental values of  $\text{SiH}_3\text{OH}_2^+\text{SiH}_4$  (Figure 3). The experimental values are given with peak width (fwhm in parenthesis) and are assigned to the most dominant vibrations.

| Mode                                       | I           | II          | III         | IV         | Exp                 |
|--------------------------------------------|-------------|-------------|-------------|------------|---------------------|
| $\nu_{\text{OH}}^{\text{b}(\text{SiH}_4)}$ | 2858 (2284) |             |             |            | <b>A1</b> 2830 (60) |
| $\nu_{\text{OH}}^{\text{b}(\text{SiH}_4)}$ |             | 2851 (2195) |             |            |                     |
| $\nu_{\text{OH}}^{\text{b}(\text{SiH}_4)}$ |             |             | 2885 (2011) |            | <b>A2</b> 2872 (50) |
| $2\beta_{\text{OH}}$                       | 3212        | 3222        | 3216        | 3228       | <b>B</b> 3194 (40)  |
| $\nu_{\text{OH}}^{\text{s}}$               |             |             |             | 3587 (183) | <b>D</b> 3578 (20)  |
| $\nu_{\text{OH}}^{\text{f}}$               | 3608 (233)  |             |             |            | <b>E</b> 3602 (30)  |
| $\nu_{\text{OH}}^{\text{f}}$               |             | 3605 (269)  |             |            |                     |
| $\nu_{\text{OH}}^{\text{f}}$               |             |             | 3611 (287)  |            |                     |
| $\nu_{\text{OH}}^{\text{a}}$               |             |             |             | 3662 (239) | <b>F</b> 3695 (10)  |

**Table S3.** Computed vibrational frequencies (in  $\text{cm}^{-1}$ , B3LYP-D3/aug-cc-pVTZ) of  $\text{SiH}_3\text{OH}_2^+\text{SiH}_4(\text{I-IV})-\text{Ar}(\text{I-IV})$  compared to experimental values of  $\text{SiH}_3\text{OH}_2^+\text{SiH}_4-\text{Ar}$  (Figure 4). The experimental values are given with peak width (fwhm in parenthesis) and are assigned to the most dominant vibrations.

| Mode               | $\nu_{\text{OH}}^{\text{b}(\text{SiH}_4)}$ | $\nu_{\text{OH}}^{\text{b}(\text{SiH}_4)}$ | $2\beta_{\text{OH}}$ | $\nu_{\text{OH}}^{\text{b}(\text{Ar})}$ | $\nu_{\text{OH}}^{\text{b}(\text{Ar})}$ | $\nu_{\text{OH}}^{\text{s}}$ | $\nu_{\text{OH}}^{\text{f}}$ | $\nu_{\text{OH}}^{\text{a}}$ |
|--------------------|--------------------------------------------|--------------------------------------------|----------------------|-----------------------------------------|-----------------------------------------|------------------------------|------------------------------|------------------------------|
| <b>I-Ar(I)</b>     |                                            | 2934 (2195)                                | 3216                 | 3448 (839)                              |                                         |                              |                              |                              |
| <b>I-Ar(II)</b>    | 2870 (2119)                                |                                            | 3214                 |                                         |                                         |                              | 3615 (233)                   |                              |
| <b>I-Ar(III)</b>   |                                            | 2901 (2270)                                | 3214                 |                                         |                                         |                              | 3611 (232)                   |                              |
| <b>I-Ar(IV)</b>    | 2827 (2413)                                |                                            | 3210                 |                                         |                                         |                              | 3609 (226)                   |                              |
| <b>II-Ar(I)</b>    |                                            | 2925 (2125)                                | 3216                 | 3442 (921)                              |                                         |                              |                              |                              |
| <b>II-Ar(II)</b>   | 2869 (2034)                                |                                            | 3222                 |                                         |                                         |                              | 3611 (276)                   |                              |
| <b>II-Ar(III)</b>  |                                            | 2896 (2162)                                | 3222                 |                                         |                                         |                              | 3609 (270)                   |                              |
| <b>II-Ar(IV)</b>   | 2822 (2298)                                |                                            | 3220                 |                                         |                                         |                              | 3605 (273)                   |                              |
| <b>III-Ar(I)</b>   |                                            | 2958 (1928)                                | 3216                 | 3442 (974)                              |                                         |                              |                              |                              |
| <b>III-Ar(II)</b>  | n.a.                                       |                                            | n.a.                 |                                         |                                         |                              |                              | n.a.                         |
| <b>III-Ar(III)</b> |                                            | 2930 (1949)                                | 3222                 |                                         |                                         |                              | 3614 (288)                   |                              |
| <b>III-Ar(IV)</b>  | 2857 (2085)                                |                                            | 3218                 |                                         |                                         |                              | 3613 (293)                   |                              |
| <b>IV-Ar(I)</b>    |                                            |                                            | 3224                 | 3482 (664)                              |                                         |                              | 3633 (283)                   |                              |
| <b>IV-Ar(II)</b>   |                                            |                                            | 3226                 | 3482 (671)                              |                                         |                              | 3634 (279)                   |                              |
| <b>IV-Ar(III)</b>  |                                            |                                            | 3226                 |                                         |                                         | 3579 (181)                   |                              | 3663 (235)                   |
| <b>IV-Ar(IV)</b>   |                                            |                                            | 3228                 |                                         |                                         | 3580 (181)                   |                              | 3664 (234)                   |
| EXP                | <b>A1</b> 2869 (20)                        | <b>A2</b> 2910 (70)                        | <b>B</b> 3232 (45)   | <b>C1</b> 3456 (20)                     | <b>C2</b> 3495 (20)                     |                              | <b>E</b> 3629 (15)           |                              |

**Table S4.** Various energies of the  $\text{SiH}_3\text{OH}_2^+\text{SiH}_4(\text{I-IV})$  isomers calculated at the B3LYP-D3/aug-cc-pVTZ level. Energies are given in  $\text{kJ mol}^{-1}$ .

| Isomer | $E_0$ | $E_e$ | $G_0$ | $D_0(\text{SiH}_4)$ |
|--------|-------|-------|-------|---------------------|
| I      | 0.00  | 0.00  | 0.00  | 38.86               |
| II     | 0.13  | -0.12 | 1.56  | 38.73               |
| III    | 0.40  | -0.19 | 3.59  | 38.46               |
| IV     | 2.64  | 1.37  | 4.14  | 36.23               |

**Table S5.** Various energies of the  $\text{SiH}_3\text{OH}_2^+\text{SiH}_4(\text{I})\text{-Ar}(\text{I-IV})$  isomers calculated at the B3LYP-D3/aug-cc-pVTZ level. Energies are given in  $\text{kJ mol}^{-1}$ .

|           | $E_0$ | $E_e$ | $G_0$ | $D_0(\text{Ar})$ |
|-----------|-------|-------|-------|------------------|
| I-Ar(I)   | 0.00  | 0.00  | 0.00  | 13.99            |
| I-Ar(II)  | 5.64  | 5.91  | 12.18 | 8.34             |
| I-Ar(III) | 6.33  | 6.25  | 11.33 | 7.65             |
| I-Ar(IV)  | 10.09 | 10.39 | 11.08 | 3.90             |

**Table S6.** Various energies of the  $\text{SiH}_3\text{OH}_2^+\text{SiH}_4(\text{II})\text{-Ar}(\text{I-IV})$  isomers calculated at the B3LYP-D3/aug-cc-pVTZ level. Energies are given in  $\text{kJ mol}^{-1}$ .

|            | $E_0$ | $E_e$ | $G_0$ | $D_0(\text{Ar})$ |
|------------|-------|-------|-------|------------------|
| II-Ar(I)   | 0.00  | 0.00  | 0.00  | 13.79            |
| II-Ar(II)  | 5.53  | 5.46  | 16.55 | 8.26             |
| II-Ar(III) | 6.03  | 6.16  | 11.65 | 7.76             |
| II-Ar(IV)  | 9.88  | 10.30 | 13.41 | 3.91             |

**Table S7.** Various energies of the  $\text{SiH}_3\text{OH}_2^+\text{SiH}_4(\text{III})\text{-Ar}(\text{I-IV})$  isomers calculated at the B3LYP-D3/aug-cc-pVTZ level. Energies are given in  $\text{kJ mol}^{-1}$ .

|             | $E_0$ | $E_e$ | $G_0$ | $D_0(\text{Ar})$ |
|-------------|-------|-------|-------|------------------|
| III-Ar(I)   | 0.00  | 0.00  | 0.00  | 13.45            |
| III-Ar(II)  | n.a.  | n.a.  | n.a.  | n.a.             |
| III-Ar(III) | 5.56  | 6.21  | 4.80  | 7.89             |
| III-Ar(IV)  | 9.86  | 10.38 | 8.64  | 3.59             |

**Table S8.** Various energies of the  $\text{SiH}_3\text{OH}_2^+\text{SiH}_4(\text{IV})\text{-Ar}(\text{I-IV})$  isomers calculated at the B3LYP-D3/aug-cc-pVTZ level. Energies are given in  $\text{kJ mol}^{-1}$ .

|            | $E_0$ | $E_e$ | $G_0$ | $D_0(\text{Ar})$ |
|------------|-------|-------|-------|------------------|
| IV-Ar(I)   | 0.00  | 0.00  | 0.00  | 11.28            |
| IV-Ar(II)  | 0.27  | 0.03  | 1.68  | 11.02            |
| IV-Ar(III) | 5.39  | 5.82  | 9.13  | 5.89             |
| IV-Ar(IV)  | 7.30  | 7.54  | 8.98  | 3.99             |

**Table S9.** Various energies of the  $\text{SiH}_3\text{OH}_2^+\text{SiH}_4(\text{I-IV})\text{-Ar(I-IV)}$  isomers calculated at the B3LYP-D3/aug-cc-pVTZ level. Energies are given in  $\text{kJ mol}^{-1}$ .

|                    | $E_0^{\text{tot}}$ | $E_e^{\text{tot}}$ | $G_0^{\text{tot}}$ | $D_0(\text{Ar})$ |
|--------------------|--------------------|--------------------|--------------------|------------------|
| <b>I-Ar(I)</b>     | 0.00               | 0.00               | 0.00               | 13.99            |
| <b>II-Ar(I)</b>    | 0.33               | -0.02              | -0.41              | 13.79            |
| <b>III-Ar(I)</b>   | 0.94               | -0.29              | 8.83               | 13.45            |
| <b>IV-Ar(I)</b>    | 5.34               | 3.70               | 9.55               | 11.28            |
| <b>IV-Ar(II)</b>   | 5.61               | 3.74               | 11.23              | 11.02            |
| <b>I-Ar(II)</b>    | 5.64               | 5.91               | 12.18              | 8.34             |
| <b>II-Ar(II)</b>   | 5.85               | 5.45               | 16.14              | 8.26             |
| <b>III-Ar(II)</b>  | n.a.               | n.a.               | n.a.               | n.a.             |
| <b>I-Ar(III)</b>   | 6.33               | 6.25               | 11.33              | 7.65             |
| <b>II-Ar(III)</b>  | 6.35               | 6.14               | 11.24              | 7.76             |
| <b>III-Ar(III)</b> | 6.50               | 5.93               | 13.63              | 7.89             |
| <b>I-Ar(IV)</b>    | 10.09              | 10.39              | 11.08              | 3.90             |
| <b>II-Ar(IV)</b>   | 10.21              | 10.29              | 13.00              | 3.91             |
| <b>IV-Ar(III)</b>  | 10.73              | 9.52               | 18.69              | 5.89             |
| <b>III-Ar(IV)</b>  | 10.80              | 10.09              | 17.47              | 3.59             |
| <b>IV-Ar(IV)</b>   | 12.63              | 11.24              | 18.53              | 3.99             |

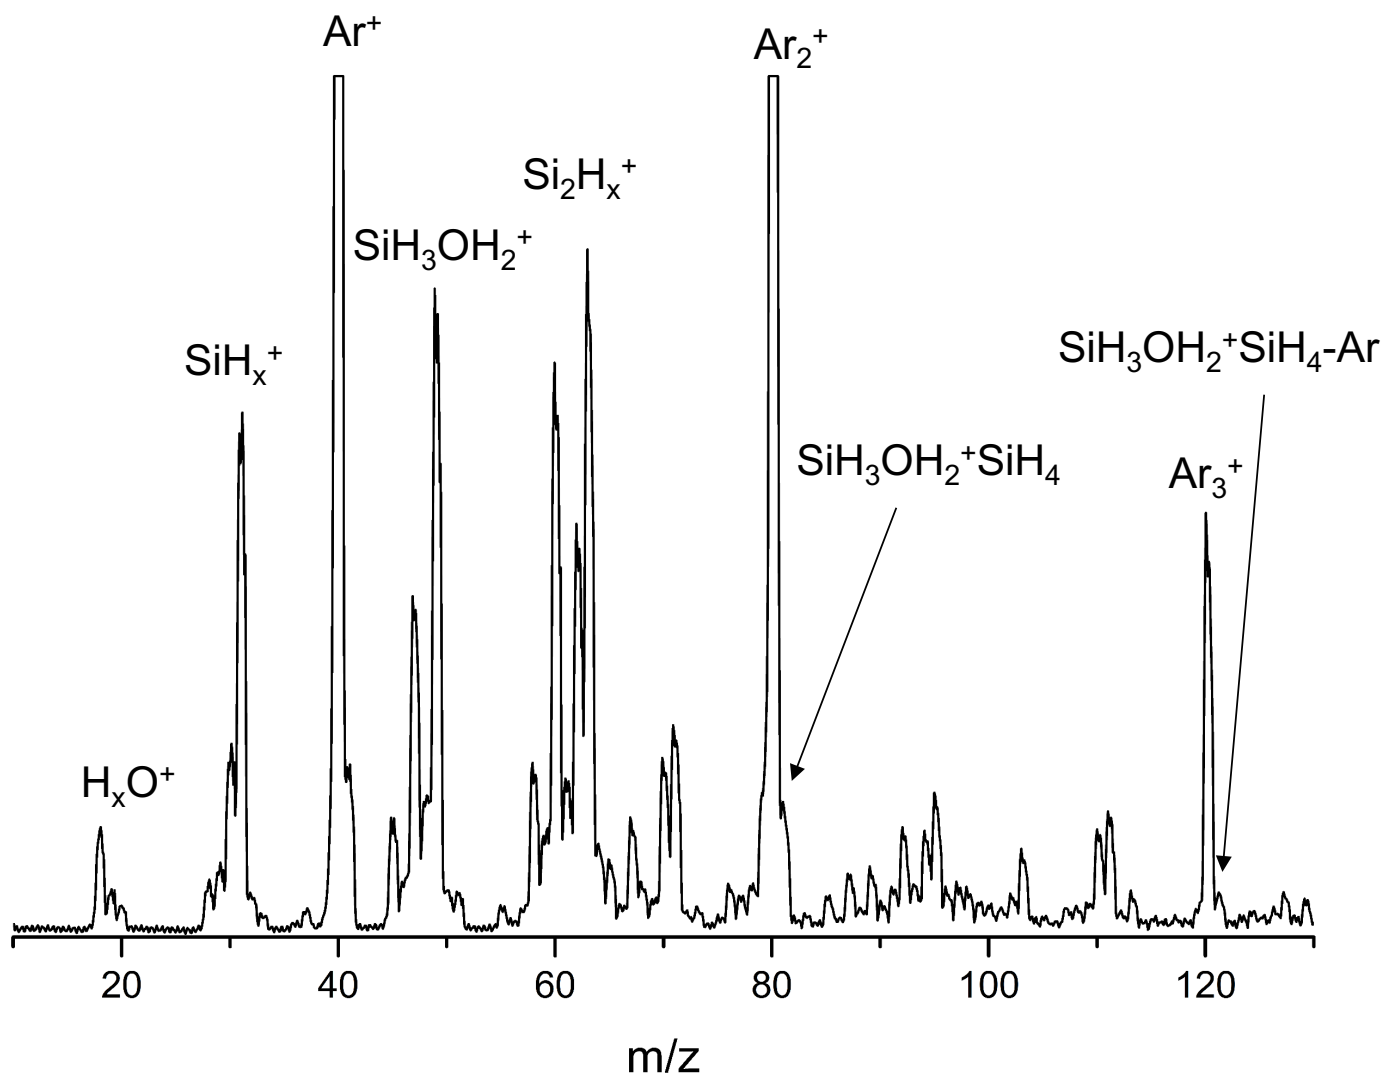

Figure S1

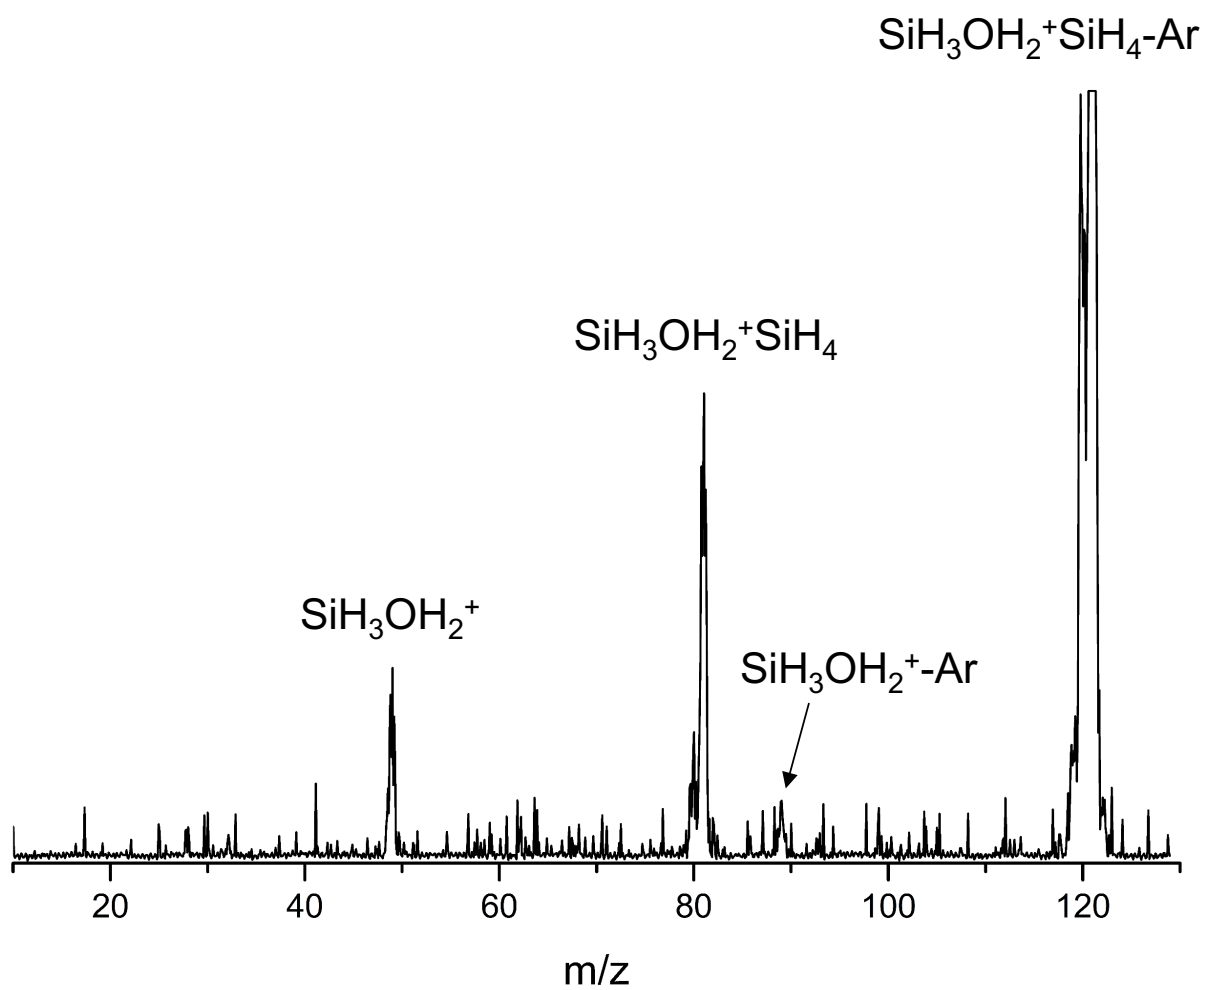

Figure S2

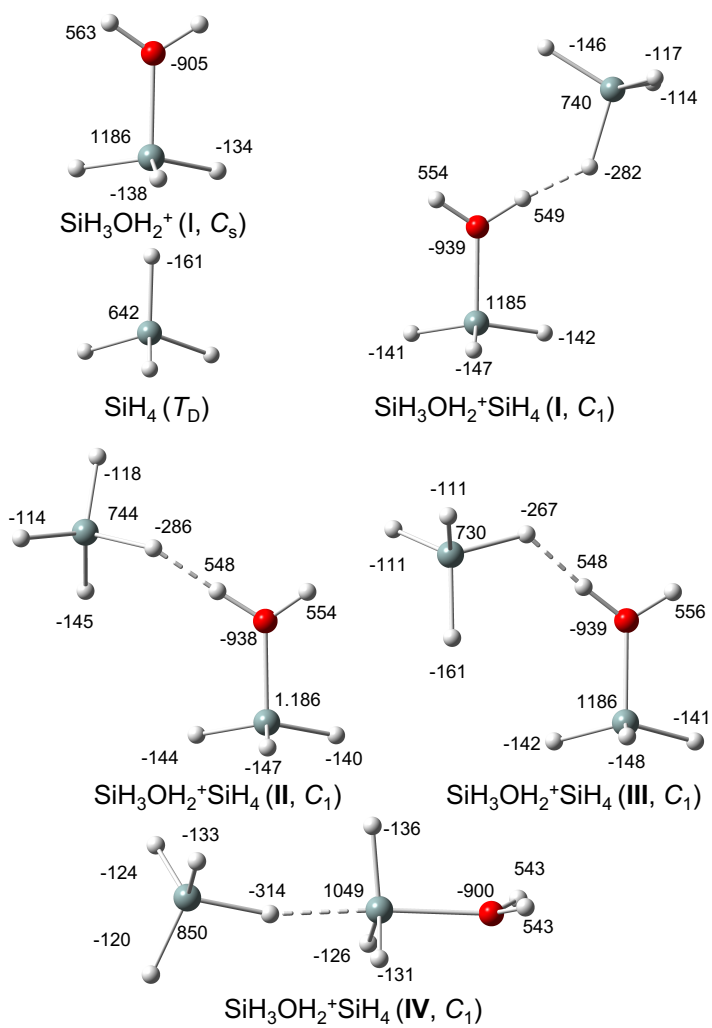

Figure S3



Figure S4

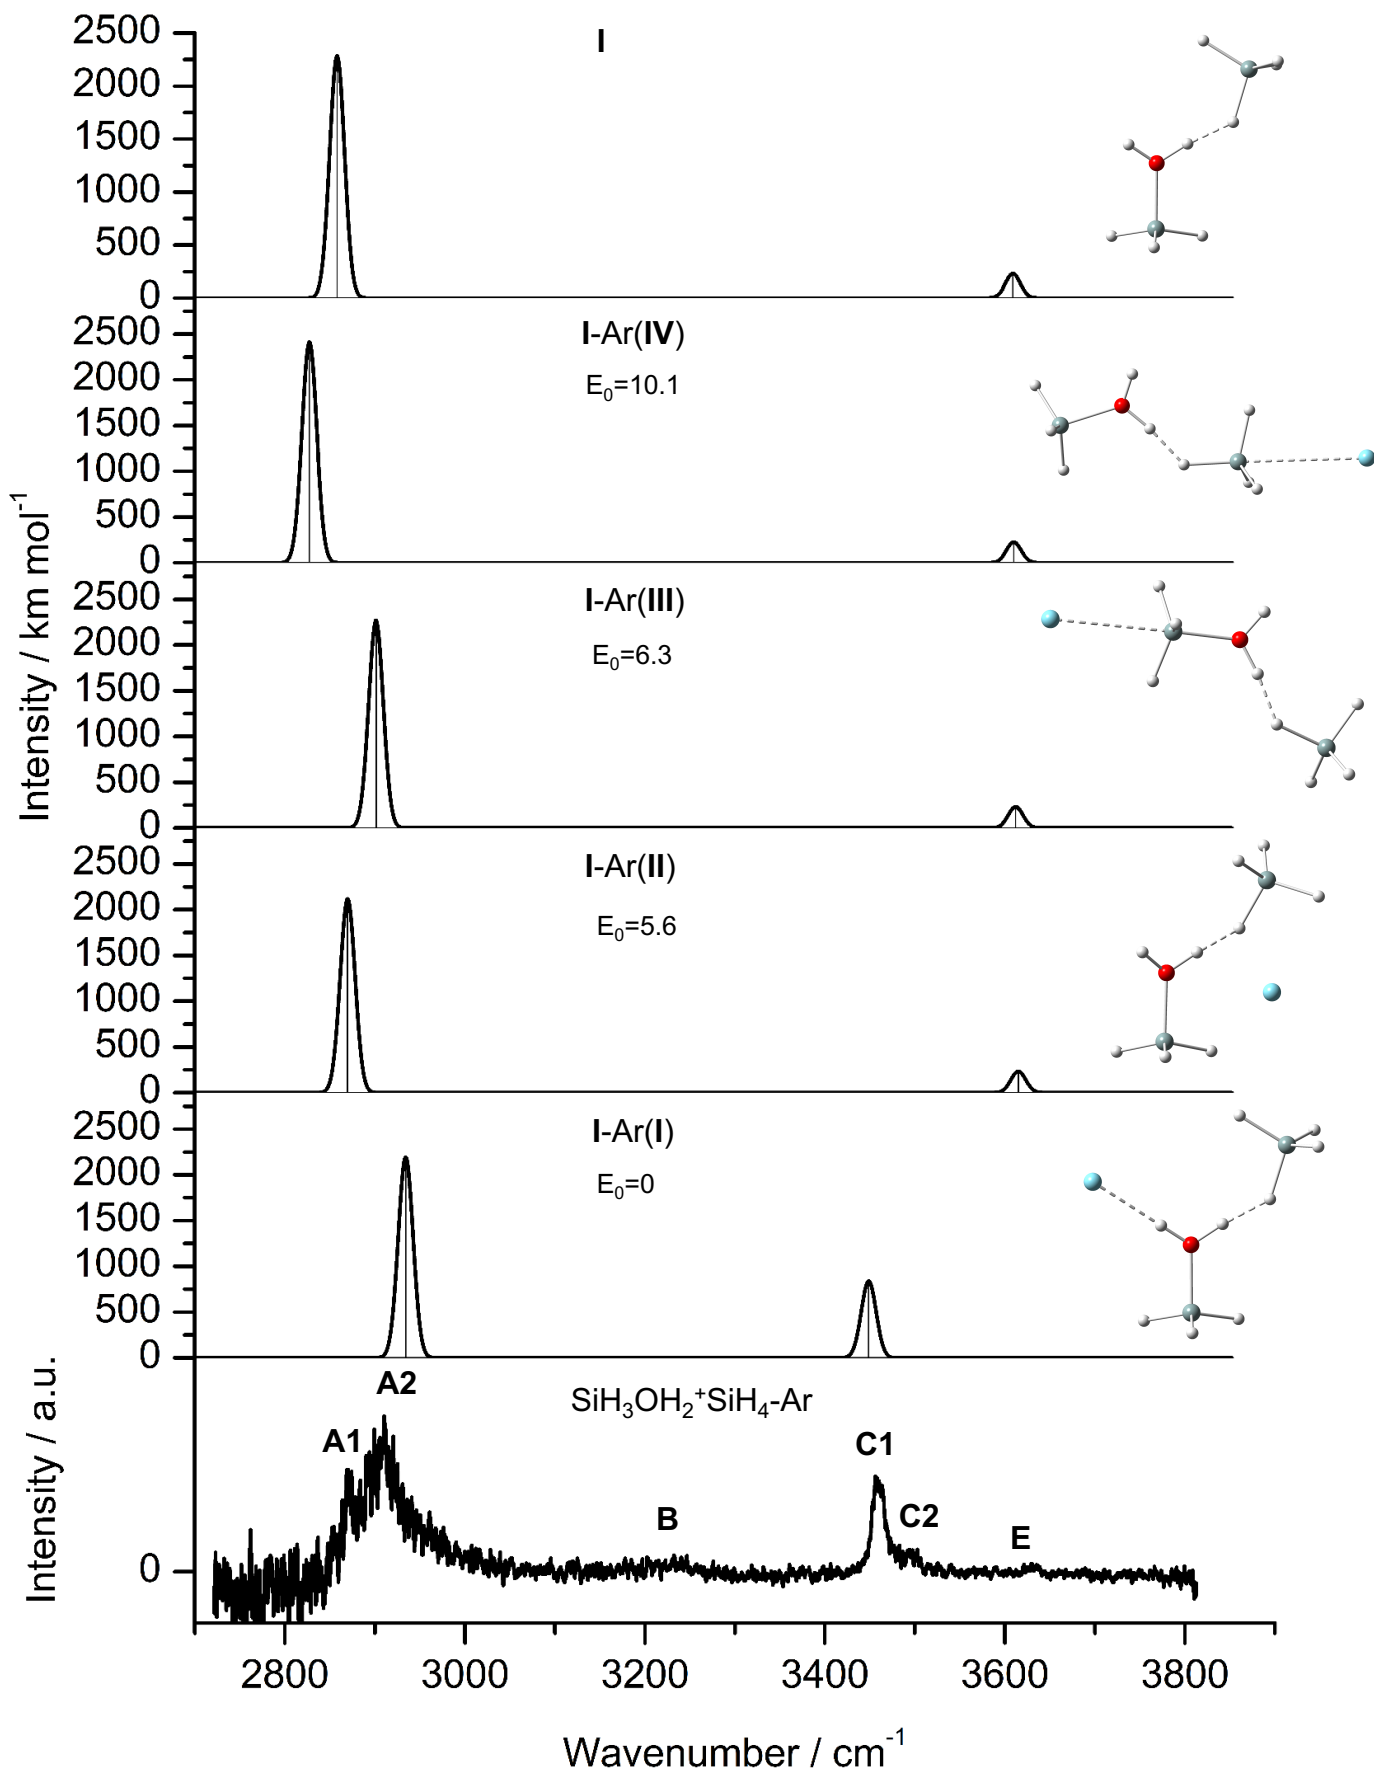

Figure S5

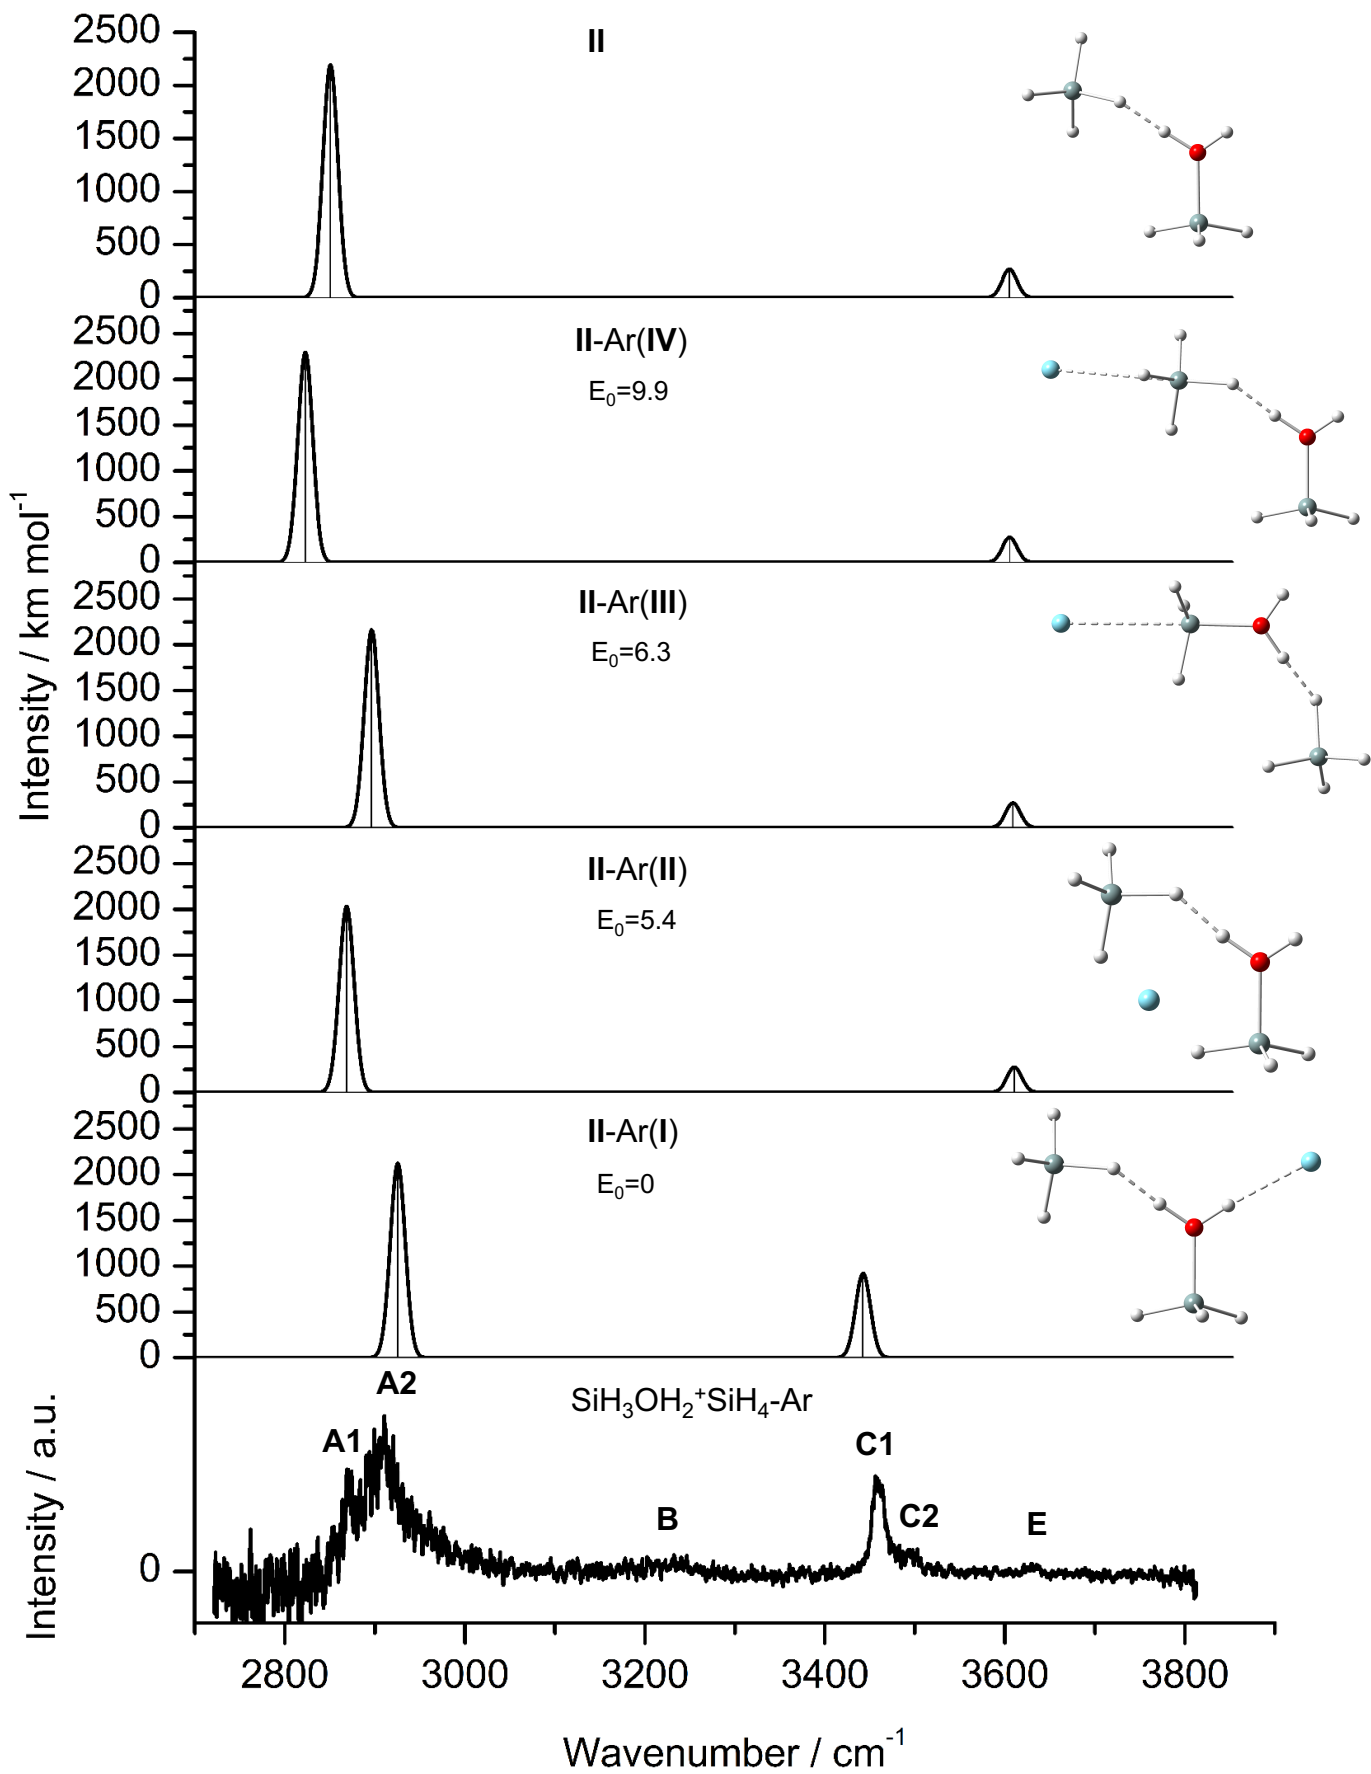

Figure S6

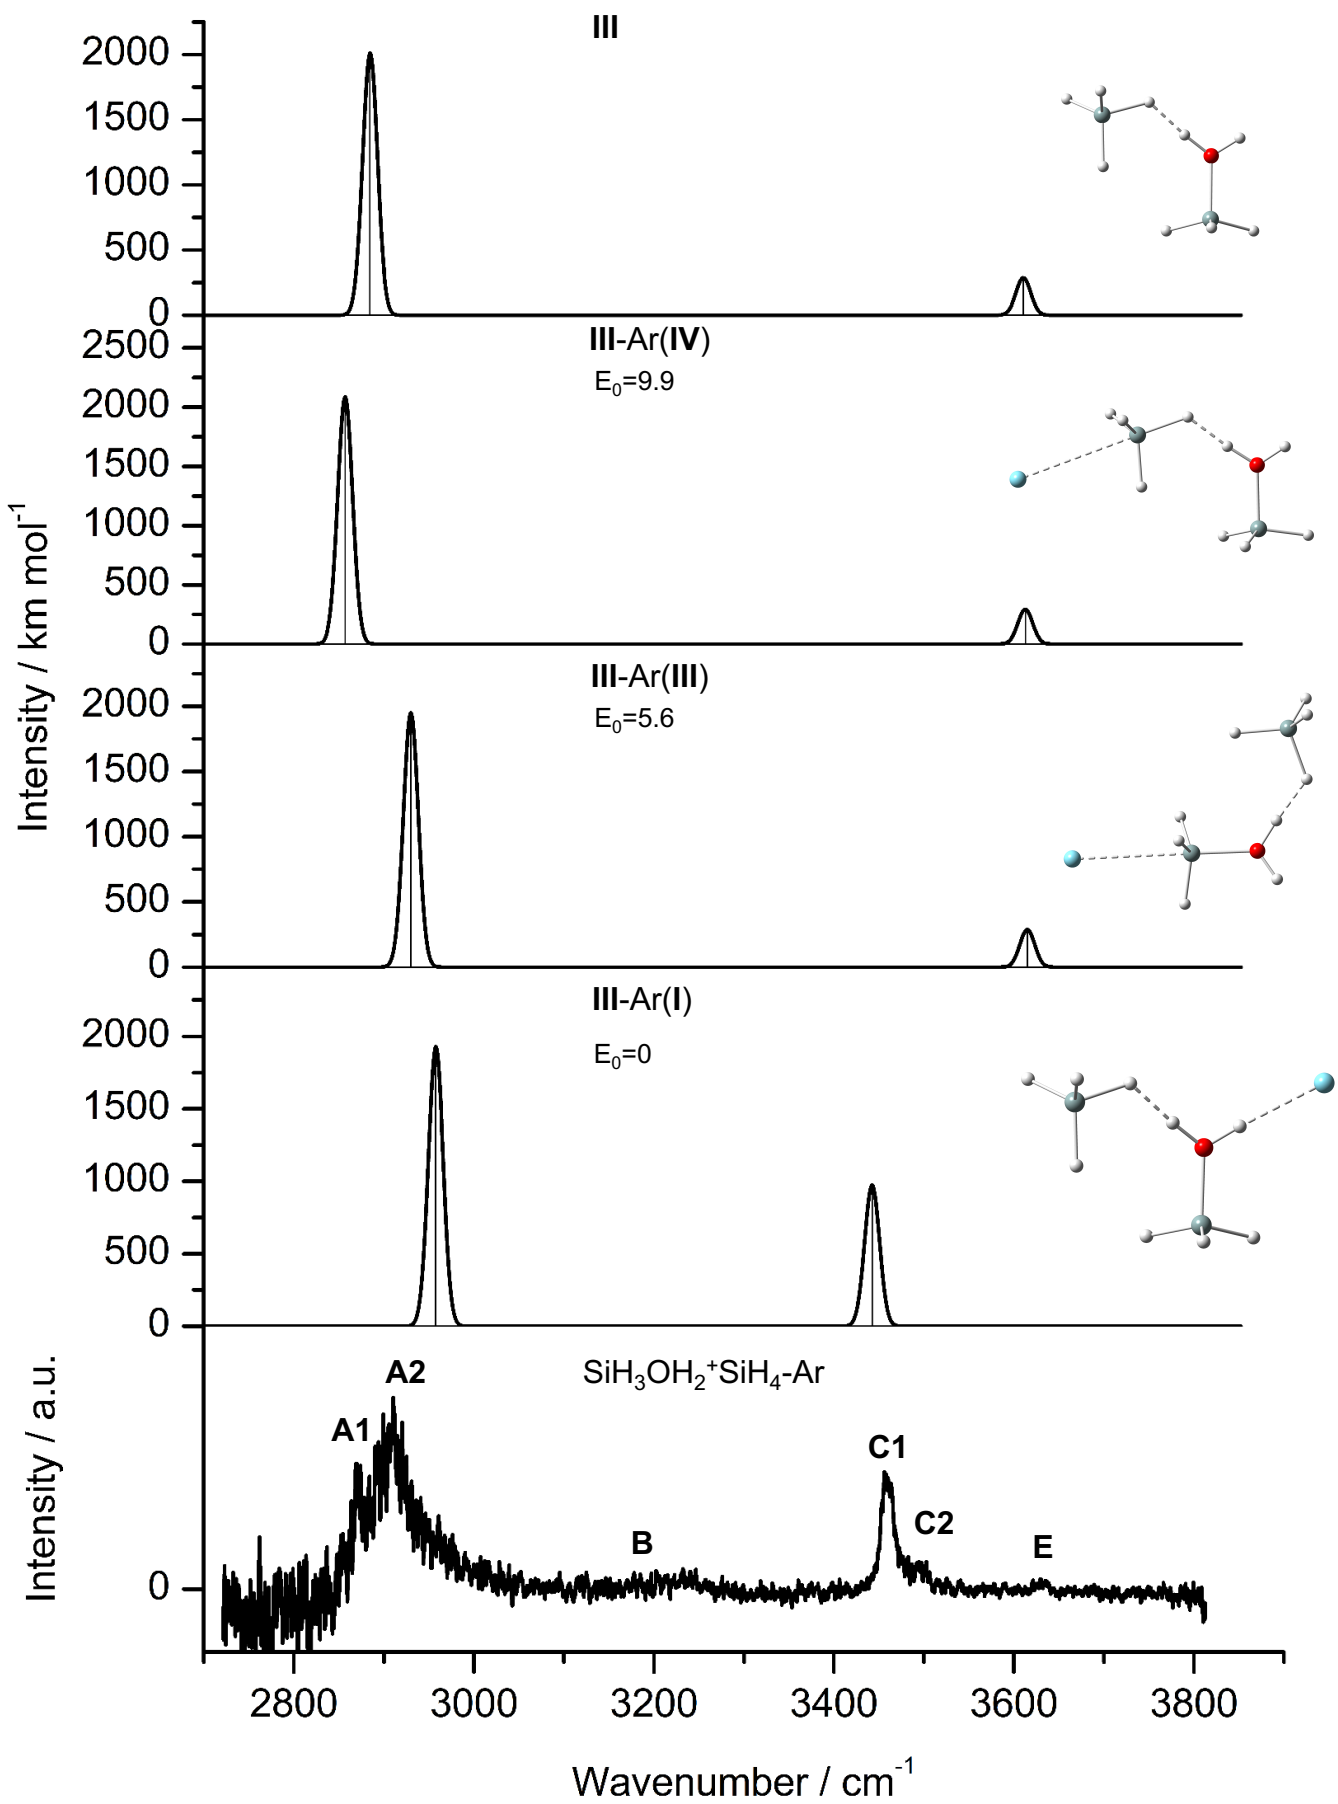

Figure S7

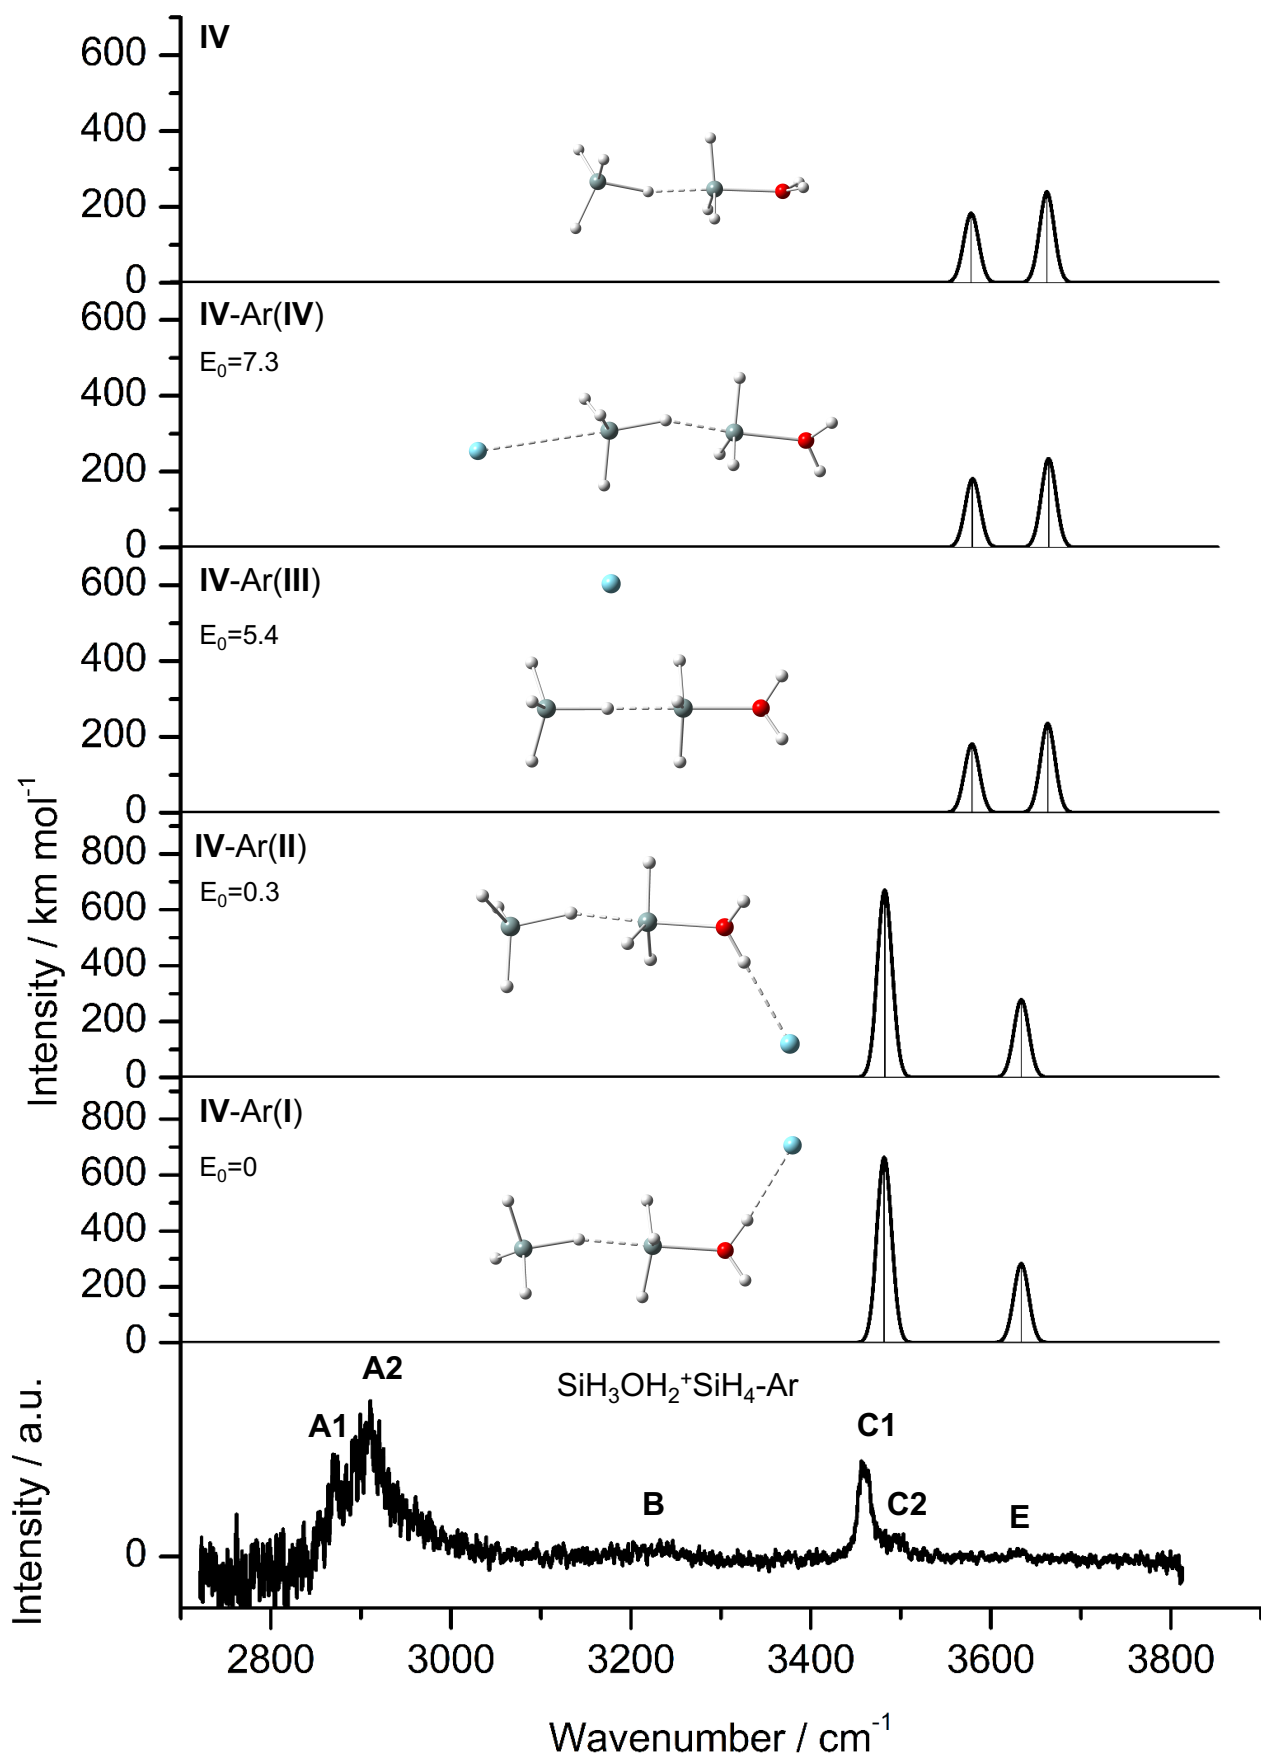

Figure S8

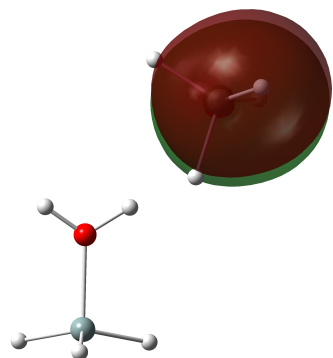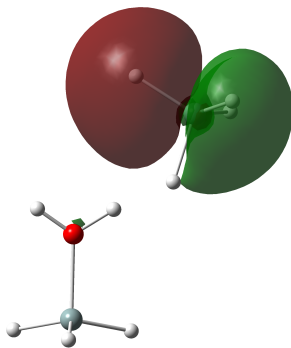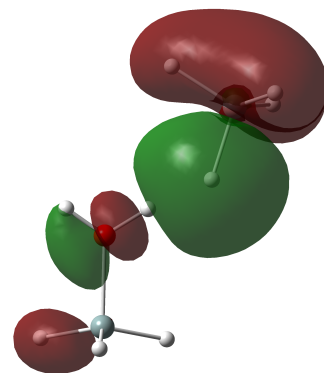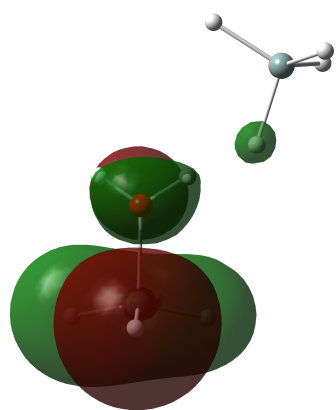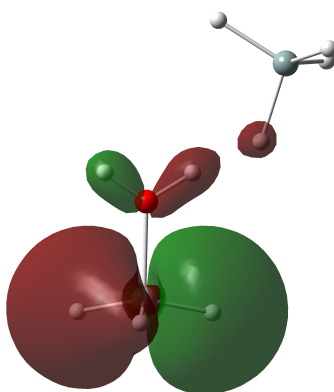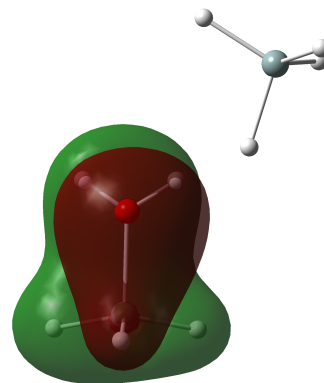

MO 19

MO 18

MO 17

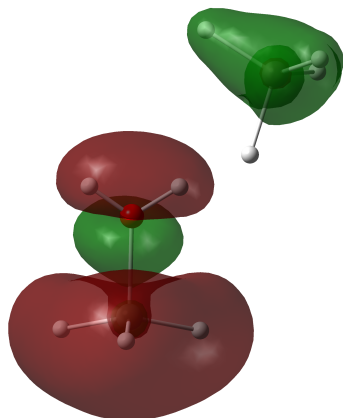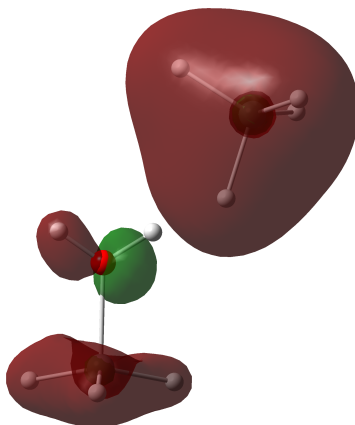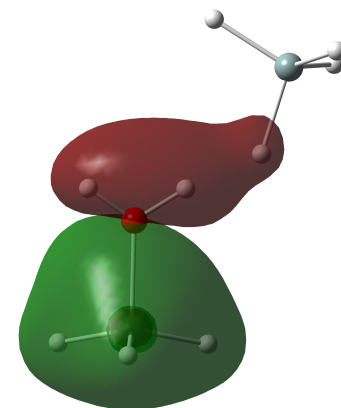

MO 16

MO 15

MO 14

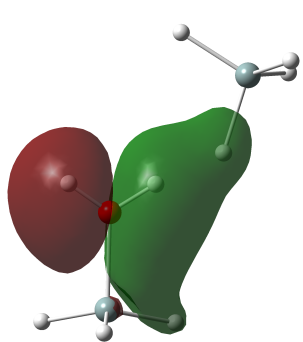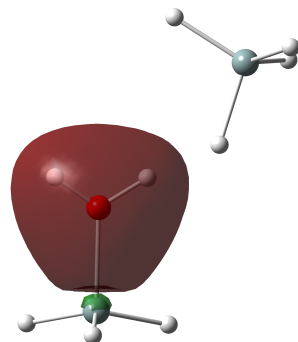

MO 13

MO 12

**Cartesian coordinates (in Å) and energies (in hartree) of all relevant structures**

**Ar**

Electronic energy= -527.560002

**SiH<sub>4</sub>**

|   |    |   |           |           |           |
|---|----|---|-----------|-----------|-----------|
| 1 | 14 | 0 | 0.000000  | 0.000000  | 0.000000  |
| 2 | 1  | 0 | 0.856604  | 0.856604  | 0.856604  |
| 3 | 1  | 0 | -0.856604 | -0.856604 | 0.856604  |
| 4 | 1  | 0 | -0.856604 | 0.856604  | -0.856604 |
| 5 | 1  | 0 | 0.856604  | -0.856604 | -0.856604 |

Sum of electronic and zero-point Energies= -291.888507  
 Sum of electronic and thermal Energies= -291.885447  
 Sum of electronic and thermal Enthalpies= -291.884503  
 Sum of electronic and thermal Free Energies= -291.907719

**SiH<sub>3</sub>OH<sub>2</sub><sup>+</sup>**

|   |    |   |           |           |           |
|---|----|---|-----------|-----------|-----------|
| 1 | 14 | 0 | 0.010328  | -0.695118 | 0.000000  |
| 2 | 1  | 0 | 0.733137  | -0.928005 | -1.254189 |
| 3 | 1  | 0 | -1.416518 | -1.035795 | 0.000000  |
| 4 | 1  | 0 | 0.733137  | -0.928005 | 1.254189  |
| 5 | 8  | 0 | 0.010328  | 1.156158  | 0.000000  |
| 6 | 1  | 0 | -0.138482 | 1.687099  | -0.799132 |
| 7 | 1  | 0 | -0.138482 | 1.687099  | 0.799132  |

Sum of electronic and zero-point Energies= -367.472638  
 Sum of electronic and thermal Energies= -367.467928  
 Sum of electronic and thermal Enthalpies= -367.466984  
 Sum of electronic and thermal Free Energies= -367.498222

**SiH<sub>3</sub>OH<sub>2</sub><sup>+</sup>SiH<sub>4</sub>(I)**

|    |    |   |           |           |           |
|----|----|---|-----------|-----------|-----------|
| 1  | 14 | 0 | -2.376994 | -0.276955 | 0.003662  |
| 2  | 1  | 0 | -3.241372 | 0.551669  | -0.843685 |
| 3  | 1  | 0 | -2.744533 | -0.323739 | 1.424024  |
| 4  | 1  | 0 | -1.905128 | -1.540581 | -0.572619 |
| 5  | 8  | 0 | -0.828782 | 0.670833  | -0.034528 |
| 6  | 1  | 0 | -0.787322 | 1.623898  | 0.135889  |
| 7  | 1  | 0 | 0.079229  | 0.241899  | 0.063900  |
| 8  | 14 | 0 | 2.714461  | -0.110385 | -0.001686 |
| 9  | 1  | 0 | 3.138967  | -0.840971 | -1.208364 |
| 10 | 1  | 0 | 3.400961  | -0.517020 | 1.236364  |
| 11 | 1  | 0 | 2.707743  | 1.355356  | -0.197579 |
| 12 | 1  | 0 | 1.257163  | -0.494414 | 0.210627  |

Sum of electronic and zero-point Energies= -659.375932  
 Sum of electronic and thermal Energies= -659.367093  
 Sum of electronic and thermal Enthalpies= -659.366149  
 Sum of electronic and thermal Free Energies= -659.411831

**SiH<sub>3</sub>OH<sub>2</sub><sup>+</sup>SiH<sub>4</sub>(II)**

|    |    |   |           |           |           |
|----|----|---|-----------|-----------|-----------|
| 1  | 14 | 0 | 2.161284  | -0.404064 | -0.001122 |
| 2  | 1  | 0 | 2.651111  | -0.430758 | 1.382425  |
| 3  | 1  | 0 | 3.120509  | 0.077511  | -1.000936 |
| 4  | 1  | 0 | 1.311746  | -1.533289 | -0.394824 |
| 5  | 8  | 0 | 0.924166  | 0.923577  | -0.021881 |
| 6  | 1  | 0 | 1.155071  | 1.860441  | 0.071271  |
| 7  | 1  | 0 | -0.049950 | 0.768268  | 0.193008  |
| 8  | 14 | 0 | -2.563248 | -0.146421 | -0.010148 |
| 9  | 1  | 0 | -3.390605 | 0.866137  | -0.688949 |
| 10 | 1  | 0 | -3.204898 | -0.781170 | 1.153948  |
| 11 | 1  | 0 | -1.979052 | -1.126705 | -0.949387 |
| 12 | 1  | 0 | -1.379753 | 0.617747  | 0.566268  |

Sum of electronic and zero-point Energies= -659.375883  
 Sum of electronic and thermal Energies= -659.367141

Sum of electronic and thermal Enthalpies= -659.366196  
 Sum of electronic and thermal Free Energies= -659.411236

**SiH<sub>3</sub>OH<sub>2</sub><sup>+</sup>SiH<sub>4</sub>(III)**

|    |    |   |           |           |           |
|----|----|---|-----------|-----------|-----------|
| 1  | 14 | 0 | 2.003314  | -0.455886 | 0.003373  |
| 2  | 1  | 0 | 3.310474  | 0.171178  | -0.222542 |
| 3  | 1  | 0 | 1.449109  | -1.239761 | -1.104939 |
| 4  | 1  | 0 | 1.791363  | -1.021667 | 1.340935  |
| 5  | 8  | 0 | 0.937456  | 1.013411  | -0.036823 |
| 6  | 1  | 0 | 1.258564  | 1.895729  | 0.202868  |
| 7  | 1  | 0 | -0.069058 | 0.976561  | -0.028497 |
| 8  | 14 | 0 | -2.419601 | -0.151687 | 0.003592  |
| 9  | 1  | 0 | -3.189533 | -0.102693 | -1.250506 |
| 10 | 1  | 0 | -3.216666 | 0.001563  | 1.232226  |
| 11 | 1  | 0 | -1.520783 | -1.328669 | 0.063150  |
| 12 | 1  | 0 | -1.485097 | 1.046477  | -0.035625 |

Sum of electronic and zero-point Energies= -659.375778  
 Sum of electronic and thermal Energies= -659.367076  
 Sum of electronic and thermal Enthalpies= -659.366132  
 Sum of electronic and thermal Free Energies= -659.410464

**SiH<sub>3</sub>OH<sub>2</sub><sup>+</sup>SiH<sub>4</sub>(IV)**

|    |    |   |           |           |           |
|----|----|---|-----------|-----------|-----------|
| 1  | 14 | 0 | 0.893595  | 0.060105  | -0.037657 |
| 2  | 1  | 0 | 0.921960  | 1.374991  | -0.683796 |
| 3  | 1  | 0 | 0.682877  | -0.014545 | 1.411212  |
| 4  | 1  | 0 | 0.764833  | -1.163855 | -0.832522 |
| 5  | 8  | 0 | 2.838112  | -0.060021 | -0.002396 |
| 6  | 1  | 0 | 3.401973  | 0.688495  | 0.241901  |
| 7  | 1  | 0 | 3.307864  | -0.889188 | 0.169974  |
| 8  | 1  | 0 | -2.537258 | -1.325553 | 0.706490  |
| 9  | 14 | 0 | -2.485362 | -0.023854 | 0.016869  |
| 10 | 1  | 0 | -3.050559 | -0.041058 | -1.343204 |
| 11 | 1  | 0 | -2.922822 | 1.110549  | 0.848633  |
| 12 | 1  | 0 | -0.989024 | 0.232824  | -0.208488 |

Sum of electronic and zero-point Energies= -659.374928  
 Sum of electronic and thermal Energies= -659.365826  
 Sum of electronic and thermal Enthalpies= -659.364882  
 Sum of electronic and thermal Free Energies= -659.410253

**SiH<sub>3</sub>OH<sub>2</sub><sup>+</sup>SiH<sub>4</sub>(I)-Ar(I)**

|    |    |   |           |           |           |
|----|----|---|-----------|-----------|-----------|
| 1  | 14 | 0 | 1.296506  | 2.239831  | 0.038317  |
| 2  | 1  | 0 | 2.476062  | 1.968292  | -0.790904 |
| 3  | 1  | 0 | 1.557480  | 2.355191  | 1.478397  |
| 4  | 1  | 0 | 0.321741  | 3.193030  | -0.503251 |
| 5  | 8  | 0 | 0.372611  | 0.699321  | -0.140892 |
| 6  | 1  | 0 | 0.783462  | -0.184885 | -0.093279 |
| 7  | 1  | 0 | -0.627412 | 0.646079  | -0.069493 |
| 8  | 14 | 0 | -3.160973 | -0.304444 | 0.015900  |
| 9  | 1  | 0 | -3.989646 | 0.043221  | -1.151371 |
| 10 | 1  | 0 | -3.843400 | -0.152807 | 1.313006  |
| 11 | 1  | 0 | -2.500130 | -1.619573 | -0.126171 |
| 12 | 1  | 0 | -2.034946 | 0.713922  | 0.032700  |
| 13 | 18 | 0 | 1.721024  | -2.202914 | 0.015470  |

Sum of electronic and zero-point Energies= -1186.941261  
 Sum of electronic and thermal Energies= -1186.930066  
 Sum of electronic and thermal Enthalpies= -1186.929122  
 Sum of electronic and thermal Free Energies= -1186.985282

**SiH<sub>3</sub>OH<sub>2</sub><sup>+</sup>SiH<sub>4</sub>(I)-Ar(II)**

|                                              |    |   |              |           |           |
|----------------------------------------------|----|---|--------------|-----------|-----------|
| 1                                            | 14 | 0 | -2.419642    | -0.580650 | 0.273942  |
| 2                                            | 1  | 0 | -3.337428    | -1.715876 | 0.128203  |
| 3                                            | 1  | 0 | -2.795210    | 0.627539  | -0.468538 |
| 4                                            | 1  | 0 | -1.859898    | -0.366038 | 1.612451  |
| 5                                            | 8  | 0 | -0.929159    | -1.164434 | -0.576142 |
| 6                                            | 1  | 0 | -0.884920    | -1.348273 | -1.526057 |
| 7                                            | 1  | 0 | -0.010162    | -1.122722 | -0.163951 |
| 8                                            | 14 | 0 | 2.612214     | -0.884592 | 0.123416  |
| 9                                            | 1  | 0 | 3.351050     | -2.122061 | 0.427315  |
| 10                                           | 1  | 0 | 3.049952     | 0.294846  | 0.889350  |
| 11                                           | 1  | 0 | 2.526434     | -0.615352 | -1.328429 |
| 12                                           | 1  | 0 | 1.183432     | -1.145919 | 0.569605  |
| 13                                           | 18 | 0 | 0.195223     | 2.074596  | -0.060768 |
| Sum of electronic and zero-point Energies=   |    |   | -1186.939112 |           |           |
| Sum of electronic and thermal Energies=      |    |   | -1186.927815 |           |           |
| Sum of electronic and thermal Enthalpies=    |    |   | -1186.926871 |           |           |
| Sum of electronic and thermal Free Energies= |    |   | -1186.980642 |           |           |

**SiH<sub>3</sub>OH<sub>2</sub><sup>+</sup>SiH<sub>4</sub>(I)-Ar(III)**

|                                              |    |   |              |           |           |
|----------------------------------------------|----|---|--------------|-----------|-----------|
| 1                                            | 14 | 0 | -0.804113    | 0.520499  | 0.017463  |
| 2                                            | 1  | 0 | -1.449263    | 1.548570  | -0.804413 |
| 3                                            | 1  | 0 | -1.128689    | 0.550976  | 1.447578  |
| 4                                            | 1  | 0 | -0.646790    | -0.809641 | -0.577431 |
| 5                                            | 8  | 0 | 0.931753     | 1.074921  | -0.052272 |
| 6                                            | 1  | 0 | 1.200518     | 1.989250  | 0.122211  |
| 7                                            | 1  | 0 | 1.708382     | 0.443171  | 0.049184  |
| 8                                            | 14 | 0 | 4.188237     | -0.551473 | -0.001284 |
| 9                                            | 1  | 0 | 4.433110     | -1.384183 | -1.191738 |
| 10                                           | 1  | 0 | 4.751606     | -1.090366 | 1.248567  |
| 11                                           | 1  | 0 | 4.541091     | 0.867952  | -0.220097 |
| 12                                           | 1  | 0 | 2.681625     | -0.567057 | 0.202286  |
| 13                                           | 18 | 0 | -3.940186    | -0.539689 | -0.004693 |
| Sum of electronic and zero-point Energies=   |    |   | -1186.938849 |           |           |
| Sum of electronic and thermal Energies=      |    |   | -1186.927545 |           |           |
| Sum of electronic and thermal Enthalpies=    |    |   | -1186.926601 |           |           |
| Sum of electronic and thermal Free Energies= |    |   | -1186.980966 |           |           |

**SiH<sub>3</sub>OH<sub>2</sub><sup>+</sup>SiH<sub>4</sub>(I)-Ar(IV)**

|                                              |    |   |              |           |           |
|----------------------------------------------|----|---|--------------|-----------|-----------|
| 1                                            | 14 | 0 | -4.176413    | 0.127006  | 0.019353  |
| 2                                            | 1  | 0 | -4.970401    | -0.860933 | 0.758078  |
| 3                                            | 1  | 0 | -4.519324    | 0.275489  | -1.400306 |
| 4                                            | 1  | 0 | -3.848628    | 1.369713  | 0.726279  |
| 5                                            | 8  | 0 | -2.542777    | -0.661910 | 0.013842  |
| 6                                            | 1  | 0 | -2.403267    | -1.587171 | -0.237888 |
| 7                                            | 1  | 0 | -1.679856    | -0.136876 | -0.026247 |
| 8                                            | 14 | 0 | 0.901284     | 0.428562  | -0.029257 |
| 9                                            | 1  | 0 | 1.376035     | 0.986853  | 1.247648  |
| 10                                           | 1  | 0 | 1.444787     | 1.081883  | -1.231461 |
| 11                                           | 1  | 0 | 1.003806     | -1.045515 | -0.082147 |
| 12                                           | 1  | 0 | -0.592776    | 0.724560  | -0.063761 |
| 13                                           | 18 | 0 | 4.465758     | -0.182815 | 0.018763  |
| Sum of electronic and zero-point Energies=   |    |   | -1186.937418 |           |           |
| Sum of electronic and thermal Energies=      |    |   | -1186.926106 |           |           |
| Sum of electronic and thermal Enthalpies=    |    |   | -1186.925162 |           |           |
| Sum of electronic and thermal Free Energies= |    |   | -1186.981062 |           |           |



**SiH<sub>3</sub>OH<sub>2</sub><sup>+</sup>SiH<sub>4</sub>(II)-Ar(I)**

|                                              |    |   |           |           |              |
|----------------------------------------------|----|---|-----------|-----------|--------------|
| 1                                            | 14 | 0 | -0.224580 | 2.189787  | 0.022526     |
| 2                                            | 1  | 0 | -0.529425 | 2.450325  | 1.434986     |
| 3                                            | 1  | 0 | -1.301310 | 2.513023  | -0.919973    |
| 4                                            | 1  | 0 | 1.138949  | 2.530095  | -0.398427    |
| 5                                            | 8  | 0 | -0.161299 | 0.390324  | -0.115211    |
| 6                                            | 1  | 0 | -0.963438 | -0.165148 | -0.069852    |
| 7                                            | 1  | 0 | 0.663055  | -0.144064 | 0.094775     |
| 8                                            | 14 | 0 | 3.217926  | -1.002122 | 0.005018     |
| 9                                            | 1  | 0 | 3.322319  | -2.160716 | -0.899328    |
| 10                                           | 1  | 0 | 3.995780  | -1.129197 | 1.249710     |
| 11                                           | 1  | 0 | 3.460587  | 0.280355  | -0.689626    |
| 12                                           | 1  | 0 | 1.765356  | -0.956627 | 0.448114     |
| 13                                           | 18 | 0 | -2.898240 | -1.275998 | 0.015871     |
| Sum of electronic and zero-point Energies=   |    |   |           |           | -1186.941137 |
| Sum of electronic and thermal Energies=      |    |   |           |           | -1186.930031 |
| Sum of electronic and thermal Enthalpies=    |    |   |           |           | -1186.929086 |
| Sum of electronic and thermal Free Energies= |    |   |           |           | -1186.985438 |

**SiH<sub>3</sub>OH<sub>2</sub><sup>+</sup>SiH<sub>4</sub>(II)-Ar(II)**

|                                              |    |   |           |           |              |
|----------------------------------------------|----|---|-----------|-----------|--------------|
| 1                                            | 14 | 0 | 2.225094  | 0.549170  | -0.427776    |
| 2                                            | 1  | 0 | 2.719089  | -0.751808 | 0.035780     |
| 3                                            | 1  | 0 | 3.214793  | 1.632479  | -0.423991    |
| 4                                            | 1  | 0 | 1.300417  | 0.515633  | -1.565116    |
| 5                                            | 8  | 0 | 1.081391  | 1.084141  | 0.872698     |
| 6                                            | 1  | 0 | 1.358245  | 1.280841  | 1.780129     |
| 7                                            | 1  | 0 | 0.077505  | 1.017953  | 0.806436     |
| 8                                            | 14 | 0 | -2.411352 | 1.009582  | -0.176632    |
| 9                                            | 1  | 0 | -3.080815 | 2.315659  | -0.049258    |
| 10                                           | 1  | 0 | -3.261262 | -0.148707 | 0.147683     |
| 11                                           | 1  | 0 | -1.712190 | 0.855212  | -1.470124    |
| 12                                           | 1  | 0 | -1.317256 | 1.006981  | 0.877104     |
| 13                                           | 18 | 0 | -0.296779 | -2.123328 | 0.074527     |
| Sum of electronic and zero-point Energies=   |    |   |           |           | -1186.939032 |
| Sum of electronic and thermal Energies=      |    |   |           |           | -1186.927954 |
| Sum of electronic and thermal Enthalpies=    |    |   |           |           | -1186.927010 |
| Sum of electronic and thermal Free Energies= |    |   |           |           | -1186.979134 |

**SiH<sub>3</sub>OH<sub>2</sub><sup>+</sup>SiH<sub>4</sub>(II)-Ar(III)**

|                                              |    |   |           |           |              |
|----------------------------------------------|----|---|-----------|-----------|--------------|
| 1                                            | 14 | 0 | 0.684723  | 0.737333  | 0.018331     |
| 2                                            | 1  | 0 | 1.131264  | 0.961133  | 1.397484     |
| 3                                            | 1  | 0 | 1.391366  | 1.501286  | -1.013656    |
| 4                                            | 1  | 0 | 0.298731  | -0.636483 | -0.317030    |
| 5                                            | 8  | 0 | -0.961719 | 1.516441  | -0.042529    |
| 6                                            | 1  | 0 | -1.095629 | 2.473347  | 0.031764     |
| 7                                            | 1  | 0 | -1.811265 | 1.017461  | 0.163632     |
| 8                                            | 14 | 0 | -3.761237 | -0.822913 | -0.009123    |
| 9                                            | 1  | 0 | -4.887071 | -0.293330 | -0.798348    |
| 10                                           | 1  | 0 | -4.159140 | -1.575688 | 1.192999     |
| 11                                           | 1  | 0 | -2.780186 | -1.552611 | -0.840333    |
| 12                                           | 1  | 0 | -3.021170 | 0.396867  | 0.516418     |
| 13                                           | 18 | 0 | 3.649891  | -0.734744 | -0.006756    |
| Sum of electronic and zero-point Energies=   |    |   |           |           | -1186.938842 |
| Sum of electronic and thermal Energies=      |    |   |           |           | -1186.927605 |
| Sum of electronic and thermal Enthalpies=    |    |   |           |           | -1186.926661 |
| Sum of electronic and thermal Free Energies= |    |   |           |           | -1186.981000 |

**SiH<sub>3</sub>OH<sub>2</sub><sup>+</sup>SiH<sub>4</sub>(II)-Ar(IV)**

|                                              |    |   |              |           |           |
|----------------------------------------------|----|---|--------------|-----------|-----------|
| 1                                            | 14 | 0 | 3.576302     | -0.809940 | 0.075459  |
| 2                                            | 1  | 0 | 4.118631     | -0.623530 | 1.426830  |
| 3                                            | 1  | 0 | 4.574157     | -0.923929 | -0.993777 |
| 4                                            | 1  | 0 | 2.405639     | -1.688559 | -0.020294 |
| 5                                            | 8  | 0 | 2.801249     | 0.778431  | -0.331260 |
| 6                                            | 1  | 0 | 3.314011     | 1.577722  | -0.525699 |
| 7                                            | 1  | 0 | 1.852102     | 1.012292  | -0.072149 |
| 8                                            | 14 | 0 | -0.803616    | 0.833095  | 0.190367  |
| 9                                            | 1  | 0 | -1.456042    | 1.586768  | -0.893362 |
| 10                                           | 1  | 0 | -1.404481    | 1.021311  | 1.521230  |
| 11                                           | 1  | 0 | -0.591318    | -0.589251 | -0.149775 |
| 12                                           | 1  | 0 | 0.593411     | 1.428877  | 0.310254  |
| 13                                           | 18 | 0 | -4.146316    | -0.519629 | -0.093041 |
| Sum of electronic and zero-point Energies=   |    |   | -1186.937374 |           |           |
| Sum of electronic and thermal Energies=      |    |   | -1186.926154 |           |           |
| Sum of electronic and thermal Enthalpies=    |    |   | -1186.925209 |           |           |
| Sum of electronic and thermal Free Energies= |    |   | -1186.980332 |           |           |

**SiH<sub>3</sub>OH<sub>2</sub><sup>+</sup>SiH<sub>4</sub>(III)-Ar(I)**

|                                              |    |   |              |           |           |
|----------------------------------------------|----|---|--------------|-----------|-----------|
| 1                                            | 14 | 0 | 0.019768     | 2.082282  | 0.054734  |
| 2                                            | 1  | 0 | -1.352364    | 2.524963  | -0.218608 |
| 3                                            | 1  | 0 | 1.035494     | 2.457147  | -0.934435 |
| 4                                            | 1  | 0 | 0.447820     | 2.178479  | 1.455637  |
| 5                                            | 8  | 0 | -0.154507    | 0.310002  | -0.246975 |
| 6                                            | 1  | 0 | -1.011624    | -0.149690 | -0.159177 |
| 7                                            | 1  | 0 | 0.612495     | -0.335383 | -0.231794 |
| 8                                            | 14 | 0 | 3.113765     | -1.054825 | 0.035839  |
| 9                                            | 1  | 0 | 3.843400     | -1.420299 | -1.189930 |
| 10                                           | 1  | 0 | 3.462992     | -1.848559 | 1.226198  |
| 11                                           | 1  | 0 | 3.172467     | 0.402202  | 0.304537  |
| 12                                           | 1  | 0 | 1.649688     | -1.339339 | -0.244216 |
| 13                                           | 18 | 0 | -3.027432    | -1.074107 | 0.038865  |
| Sum of electronic and zero-point Energies=   |    |   | -1186.940904 |           |           |
| Sum of electronic and thermal Energies=      |    |   | -1186.930027 |           |           |
| Sum of electronic and thermal Enthalpies=    |    |   | -1186.929083 |           |           |
| Sum of electronic and thermal Free Energies= |    |   | -1186.981919 |           |           |

**SiH<sub>3</sub>OH<sub>2</sub><sup>+</sup>SiH<sub>4</sub>(III)-Ar(III)**

|                                              |    |   |              |           |           |
|----------------------------------------------|----|---|--------------|-----------|-----------|
| 1                                            | 14 | 0 | -0.582102    | 0.773569  | -0.004367 |
| 2                                            | 1  | 0 | -1.473257    | 1.929779  | 0.134803  |
| 3                                            | 1  | 0 | -0.454461    | -0.111076 | 1.156553  |
| 4                                            | 1  | 0 | -0.584073    | 0.111078  | -1.312763 |
| 5                                            | 8  | 0 | 1.025903     | 1.632514  | 0.039851  |
| 6                                            | 1  | 0 | 1.124350     | 2.562957  | -0.211169 |
| 7                                            | 1  | 0 | 1.911501     | 1.158639  | 0.033067  |
| 8                                            | 14 | 0 | 3.500971     | -0.915622 | -0.003705 |
| 9                                            | 1  | 0 | 4.221077     | -1.227259 | 1.242306  |
| 10                                           | 1  | 0 | 4.265233     | -1.152679 | -1.240066 |
| 11                                           | 1  | 0 | 2.161881     | -1.550371 | -0.047907 |
| 12                                           | 1  | 0 | 3.221584     | 0.576378  | 0.035324  |
| 13                                           | 18 | 0 | -3.525846    | -0.742712 | 0.000225  |
| Sum of electronic and zero-point Energies=   |    |   | -1186.938786 |           |           |
| Sum of electronic and thermal Energies=      |    |   | -1186.927588 |           |           |
| Sum of electronic and thermal Enthalpies=    |    |   | -1186.926643 |           |           |
| Sum of electronic and thermal Free Energies= |    |   | -1186.980090 |           |           |

**SiH<sub>3</sub>OH<sub>2</sub><sup>+</sup>SiH<sub>4</sub>(III)-Ar(IV)**

|                                              |    |   |              |           |           |
|----------------------------------------------|----|---|--------------|-----------|-----------|
| 1                                            | 14 | 0 | 3.159448     | -0.992063 | -0.005322 |
| 2                                            | 1  | 0 | 4.618638     | -0.972471 | -0.159576 |
| 3                                            | 1  | 0 | 2.383120     | -1.437791 | -1.166588 |
| 4                                            | 1  | 0 | 2.663332     | -1.453878 | 1.296435  |
| 5                                            | 8  | 0 | 2.820072     | 0.790053  | -0.007289 |
| 6                                            | 1  | 0 | 3.485862     | 1.446621  | 0.246392  |
| 7                                            | 1  | 0 | 1.892888     | 1.187737  | -0.007568 |
| 8                                            | 14 | 0 | -0.696375    | 1.120269  | -0.011858 |
| 9                                            | 1  | 0 | -1.362427    | 1.503458  | -1.266980 |
| 10                                           | 1  | 0 | -1.374884    | 1.556552  | 1.219186  |
| 11                                           | 1  | 0 | -0.344825    | -0.318903 | 0.021442  |
| 12                                           | 1  | 0 | 0.643962     | 1.840578  | -0.019788 |
| 13                                           | 18 | 0 | -3.869403    | -0.637067 | 0.007549  |
| Sum of electronic and zero-point Energies=   |    |   | -1186.937149 |           |           |
| Sum of electronic and thermal Energies=      |    |   | -1186.926080 |           |           |
| Sum of electronic and thermal Enthalpies=    |    |   | -1186.925136 |           |           |
| Sum of electronic and thermal Free Energies= |    |   | -1186.978627 |           |           |

**SiH<sub>3</sub>OH<sub>2</sub><sup>+</sup>SiH<sub>4</sub>(IV)-Ar(I)**

|                                              |    |   |              |           |           |
|----------------------------------------------|----|---|--------------|-----------|-----------|
| 1                                            | 14 | 0 | 0.605800     | 0.542147  | -0.035207 |
| 2                                            | 1  | 0 | 0.235701     | -0.509147 | -0.986330 |
| 3                                            | 1  | 0 | 0.695873     | 0.204406  | 1.388635  |
| 4                                            | 1  | 0 | 1.241311     | 1.776947  | -0.501880 |
| 5                                            | 8  | 0 | -1.157481    | 1.304666  | -0.018806 |
| 6                                            | 1  | 0 | -1.958026    | 0.750046  | 0.008618  |
| 7                                            | 1  | 0 | -1.346763    | 2.174454  | 0.361769  |
| 8                                            | 1  | 0 | 4.305686     | 0.456796  | 0.996466  |
| 9                                            | 14 | 0 | 3.853284     | -0.548307 | 0.017131  |
| 10                                           | 1  | 0 | 4.446228     | -0.381152 | -1.321346 |
| 11                                           | 1  | 0 | 3.889042     | -1.930487 | 0.526766  |
| 12                                           | 1  | 0 | 2.365849     | -0.255165 | -0.185239 |
| 13                                           | 18 | 0 | -3.724568    | -0.702099 | 0.006448  |
| Sum of electronic and zero-point Energies=   |    |   | -1186.939228 |           |           |
| Sum of electronic and thermal Energies=      |    |   | -1186.927915 |           |           |
| Sum of electronic and thermal Enthalpies=    |    |   | -1186.926970 |           |           |
| Sum of electronic and thermal Free Energies= |    |   | -1186.981643 |           |           |

**SiH<sub>3</sub>OH<sub>2</sub><sup>+</sup>SiH<sub>4</sub>(IV)-Ar(II)**

|                                              |    |   |              |           |           |
|----------------------------------------------|----|---|--------------|-----------|-----------|
| 1                                            | 14 | 0 | -0.650853    | 0.715506  | -0.023311 |
| 2                                            | 1  | 0 | -1.177762    | 2.025910  | -0.413568 |
| 3                                            | 1  | 0 | -0.731653    | 0.314862  | 1.384724  |
| 4                                            | 1  | 0 | -0.409208    | -0.319737 | -1.031194 |
| 5                                            | 8  | 0 | 1.175703     | 1.311996  | -0.027423 |
| 6                                            | 1  | 0 | 1.446259     | 2.159062  | 0.355316  |
| 7                                            | 1  | 0 | 1.924725     | 0.689104  | -0.012595 |
| 8                                            | 1  | 0 | -3.296802    | -1.999429 | 0.371232  |
| 9                                            | 14 | 0 | -3.780244    | -0.653415 | 0.012105  |
| 10                                           | 1  | 0 | -4.424491    | -0.587216 | -1.311310 |
| 11                                           | 1  | 0 | -4.537139    | 0.008846  | 1.089075  |
| 12                                           | 1  | 0 | -2.512978    | 0.189630  | -0.140045 |
| 13                                           | 18 | 0 | 3.686044     | -0.769237 | 0.004702  |
| Sum of electronic and zero-point Energies=   |    |   | -1186.939126 |           |           |
| Sum of electronic and thermal Energies=      |    |   | -1186.927867 |           |           |
| Sum of electronic and thermal Enthalpies=    |    |   | -1186.926923 |           |           |
| Sum of electronic and thermal Free Energies= |    |   | -1186.981004 |           |           |

**SiH<sub>3</sub>OH<sub>2</sub><sup>+</sup>SiH<sub>4</sub>(IV)-Ar(III)**

|                                              |    |   |           |           |              |
|----------------------------------------------|----|---|-----------|-----------|--------------|
| 1                                            | 14 | 0 | 1.449089  | -0.419081 | 0.008468     |
| 2                                            | 1  | 0 | 1.062074  | 0.244229  | -1.238444    |
| 3                                            | 1  | 0 | 1.049227  | 0.178407  | 1.285376     |
| 4                                            | 1  | 0 | 1.950053  | -1.796187 | -0.002797    |
| 5                                            | 8  | 0 | 3.250313  | 0.325735  | -0.049819    |
| 6                                            | 1  | 0 | 3.420753  | 1.257508  | -0.251142    |
| 7                                            | 1  | 0 | 3.975450  | -0.026787 | 0.486561     |
| 8                                            | 1  | 0 | -2.295256 | -1.280776 | 1.235841     |
| 9                                            | 14 | 0 | -1.693162 | -1.789626 | -0.008342    |
| 10                                           | 1  | 0 | -1.464602 | -3.245217 | -0.015617    |
| 11                                           | 1  | 0 | -2.318503 | -1.271044 | -1.236928    |
| 12                                           | 1  | 0 | -0.283520 | -1.186432 | -0.020186    |
| 13                                           | 18 | 0 | -1.537842 | 1.969018  | 0.008563     |
| Sum of electronic and zero-point Energies=   |    |   |           |           | -1186.937174 |
| Sum of electronic and thermal Energies=      |    |   |           |           | -1186.925703 |
| Sum of electronic and thermal Enthalpies=    |    |   |           |           | -1186.924759 |
| Sum of electronic and thermal Free Energies= |    |   |           |           | -1186.978164 |

**SiH<sub>3</sub>OH<sub>2</sub><sup>+</sup>SiH<sub>4</sub>(IV)-Ar(IV)**

|                                              |    |   |           |           |              |
|----------------------------------------------|----|---|-----------|-----------|--------------|
| 1                                            | 14 | 0 | 2.604398  | 0.063687  | -0.000823    |
| 2                                            | 1  | 0 | 2.774786  | 1.491616  | -0.283055    |
| 3                                            | 1  | 0 | 2.369977  | -0.367325 | 1.380773     |
| 4                                            | 1  | 0 | 2.387772  | -0.896392 | -1.086086    |
| 5                                            | 8  | 0 | 4.536201  | -0.241086 | -0.009346    |
| 6                                            | 1  | 0 | 5.158967  | 0.370108  | 0.410479     |
| 7                                            | 1  | 0 | 4.925213  | -1.127339 | -0.039428    |
| 8                                            | 1  | 0 | -0.911218 | -1.206783 | 0.181433     |
| 9                                            | 14 | 0 | -0.753570 | 0.240997  | -0.041616    |
| 10                                           | 1  | 0 | -1.212907 | 0.703673  | -1.361457    |
| 11                                           | 1  | 0 | -1.183331 | 1.076765  | 1.091677     |
| 12                                           | 1  | 0 | 0.769287  | 0.452157  | -0.093441    |
| 13                                           | 18 | 0 | -4.293319 | -0.157409 | 0.026000     |
| Sum of electronic and zero-point Energies=   |    |   |           |           | -1186.936449 |
| Sum of electronic and thermal Energies=      |    |   |           |           | -1186.924967 |
| Sum of electronic and thermal Enthalpies=    |    |   |           |           | -1186.924023 |
| Sum of electronic and thermal Free Energies= |    |   |           |           | -1186.978224 |
